# Supplementary material for: Antibiogram Profile of Acinetobacterbaumannii Recovered from Selected Freshwater Resources in the Eastern Cape Province, South Africa
Source: MDPI journal article supplement (doi:10.3390/pathogens10091110), 2021-08-31
Supplement: s1 [file s1]

## Supplementary Figures

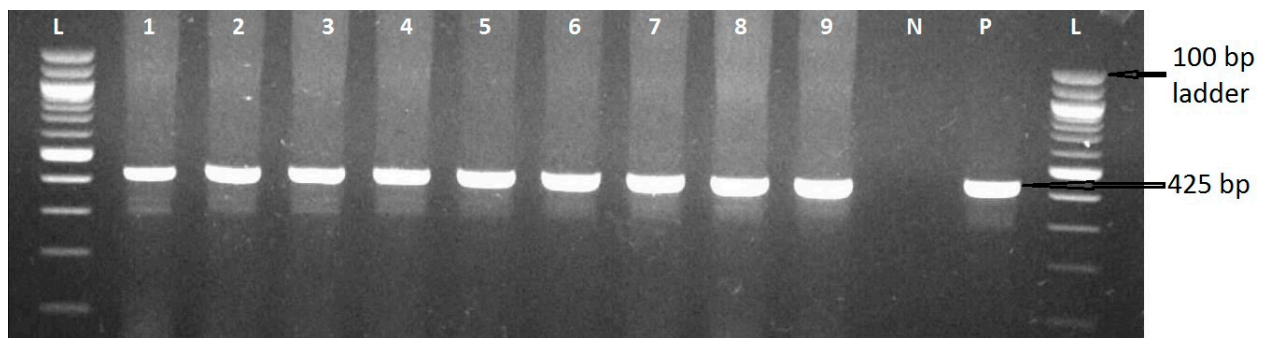

**Figure S1:** PCR analyses resolved by gel electrophoresis showing confirmed *Acinetobacter* spp. targeting the *recA* gene at 425 bp. L= DNA Ladder (100bp); Lane 1 to 9 = Selected *Acinetobacter* isolates; N= Negative control; P=Positive control (*A. baumannii*, DSM Number: 102929).

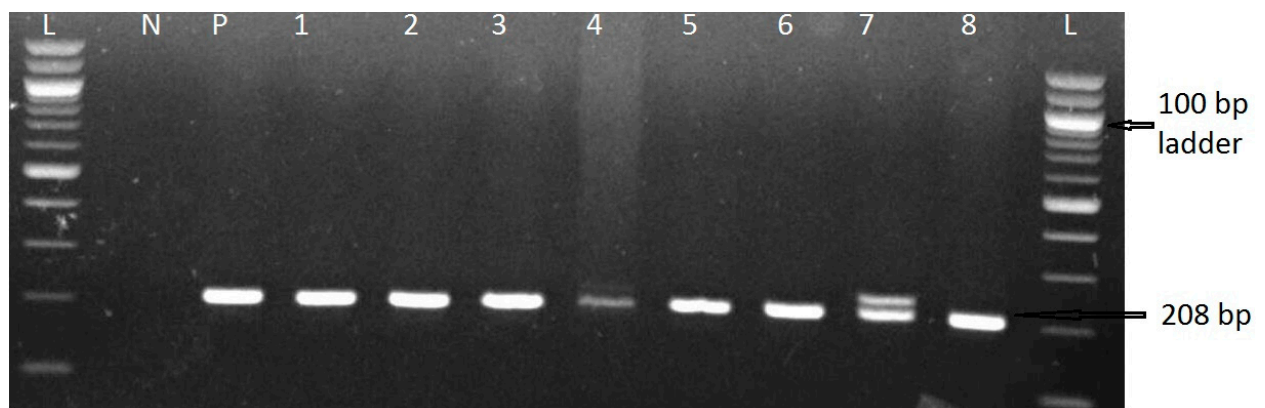

**Figure S2:** PCR analyses resolved by gel electrophoresis showing confirmed *A. baumannii* targeting the specific primer *Ab-ITS* gene at 208 bp. L= DNA Ladder (100bp); N= negative control, P= positive control (*A. baumannii*, DSM 102929); Lanes 1 to 8= selected *A. baumannii* samples.

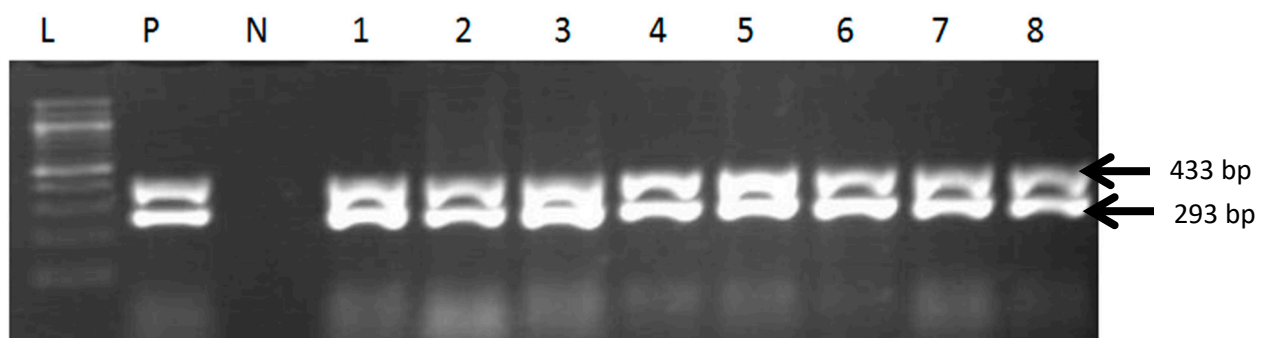

**Figure S3:** A gel electrophoresis showing sulfonamide resistance genes in *A. baumannii*. L= Ladder (100 bp); P= positive control, N= negative control, Lane 1 to 8 = Selected *A. baumannii* harbouring *sul1* (433 bp) and *sul2* (293 bp) genes.

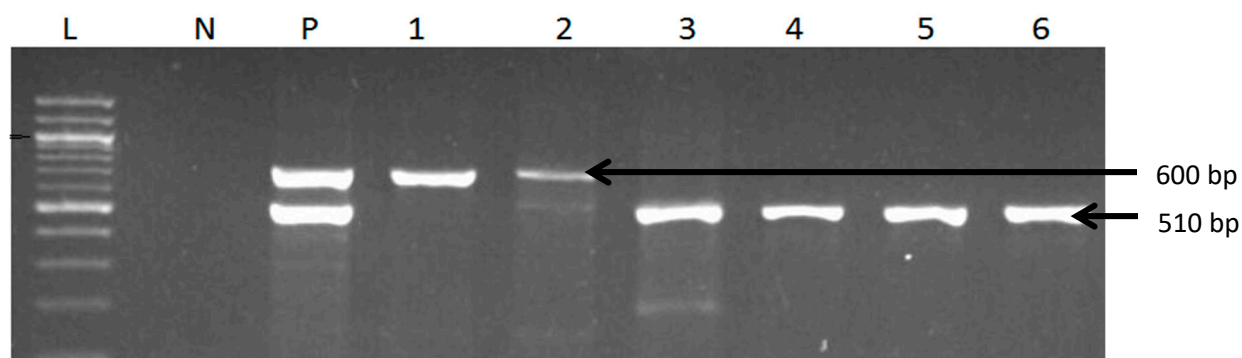

**Figure S4:** A gel electrophoresis showing aminoglycoside genes in *A. baumannii*. L= Ladder (100bp); P= positive control, N= negative control, Lane 1 and 2 = *apHA1* (600 bp) gene; lanes 3-6 = *apHA2* (510 bp) gene.

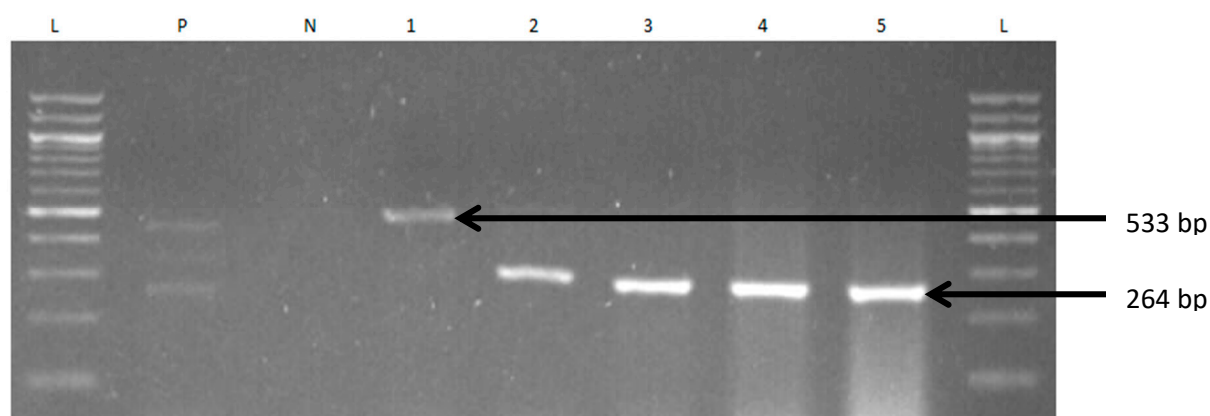

**Figure S5:** A gel electrophoresis showing Fluoroquinolones genes in *A. baumannii*. L= Ladder (100bp); P= positive control, N= negative control, Lane 1 = *qnrD* (533 bp) gene; lanes 2-5 = *qnrB* (264 bp) gene.

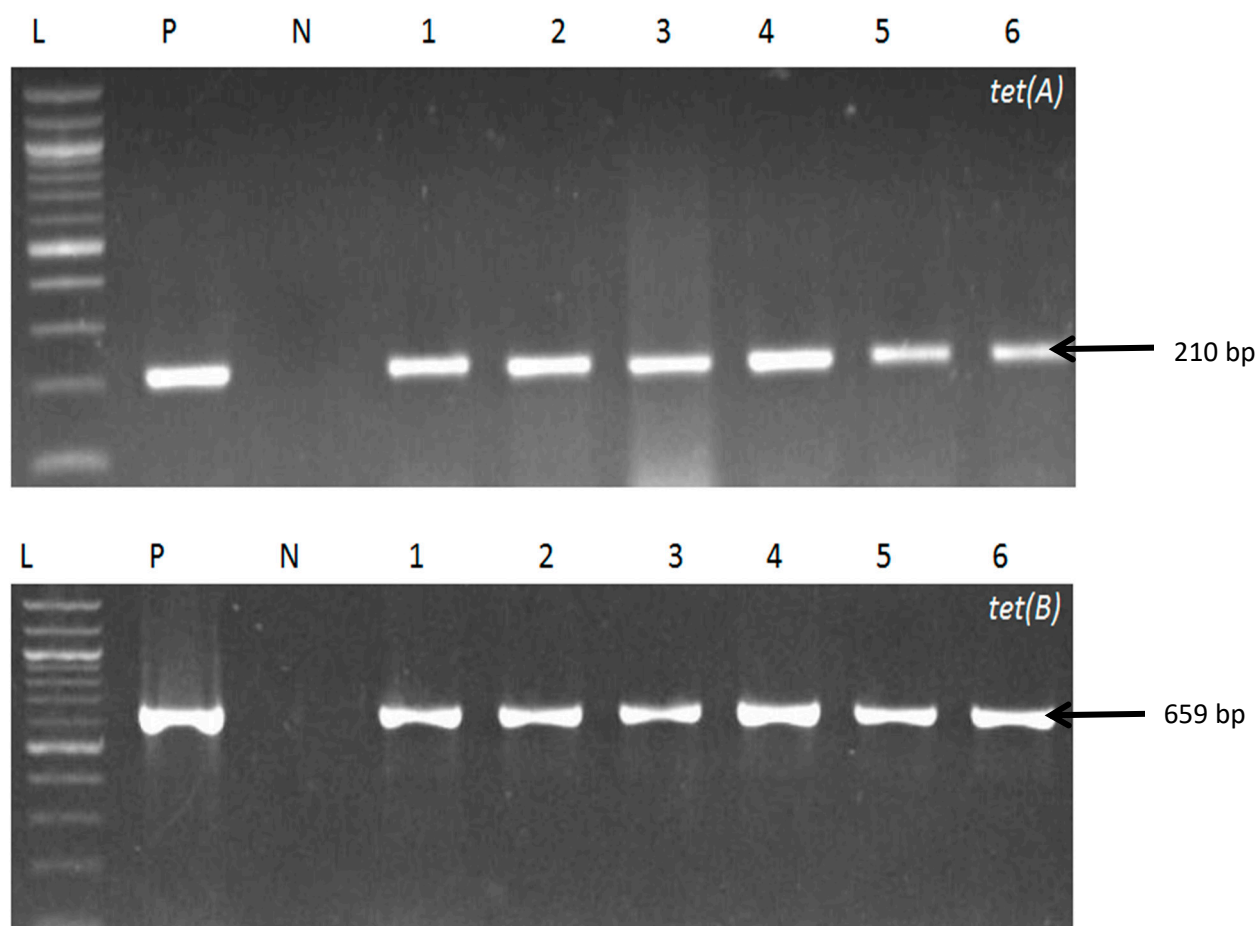

**Figure S6:** A gel electrophoresis showing Tetracycline genes *A. baumannii*. L= Ladder (100bp); P= positive control, N= negative control, Lane 1-6 = *tet(A)* (210 bp) and *tet(B)* (659 bp) genes respectively.

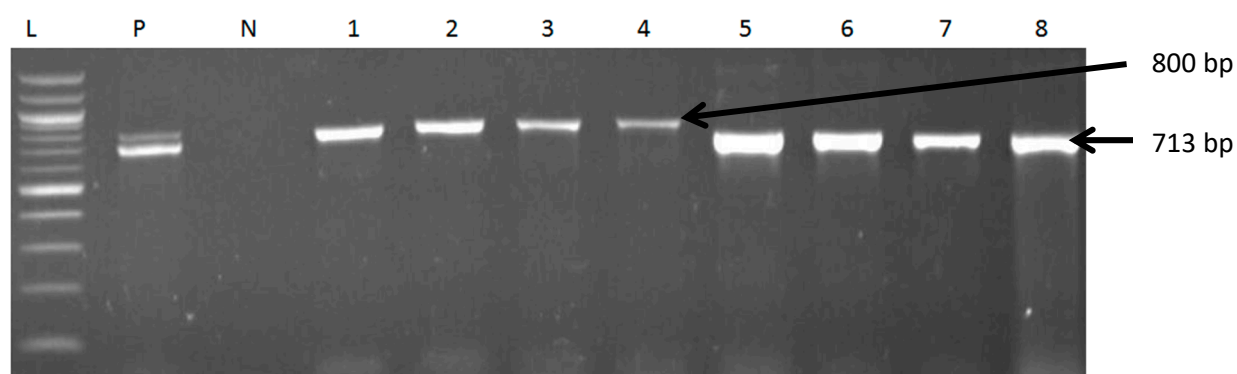

**Figure S7A:** A gel electrophoresis showing beta-lactamases genes in *A. baumannii*. L= Ladder (100bp); P= positive control, N= negative control, Lane 1-4 = *bla<sub>TEM</sub>* (800 bp) and 5-8= *bla<sub>SHV</sub>* (713 bp).

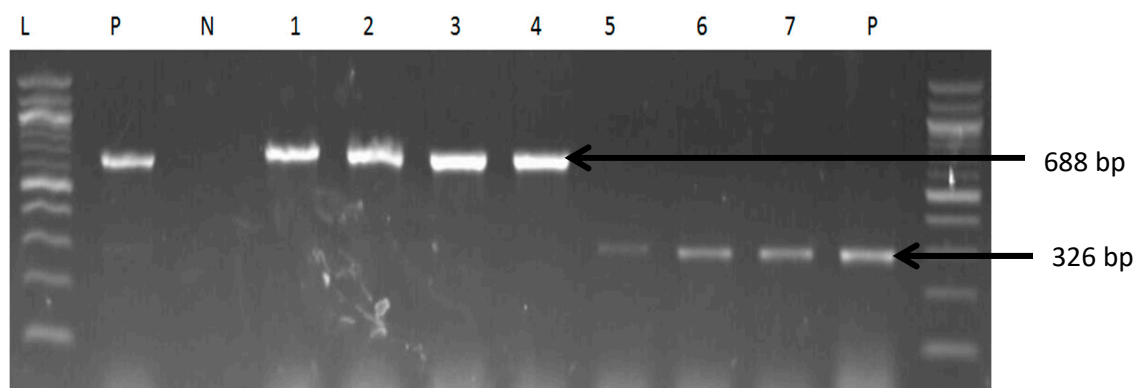

**Figure S7B:** A gel electrophoresis showing beta-lactamases genes in *A. baumannii*. L= Ladder (100bp), Lanes 1-4 = *bla<sub>CTX-M(1)</sub>* (688 bp), Lanes 5-7 = *bla<sub>CTX-M-8/-25</sub>* (326 bp).

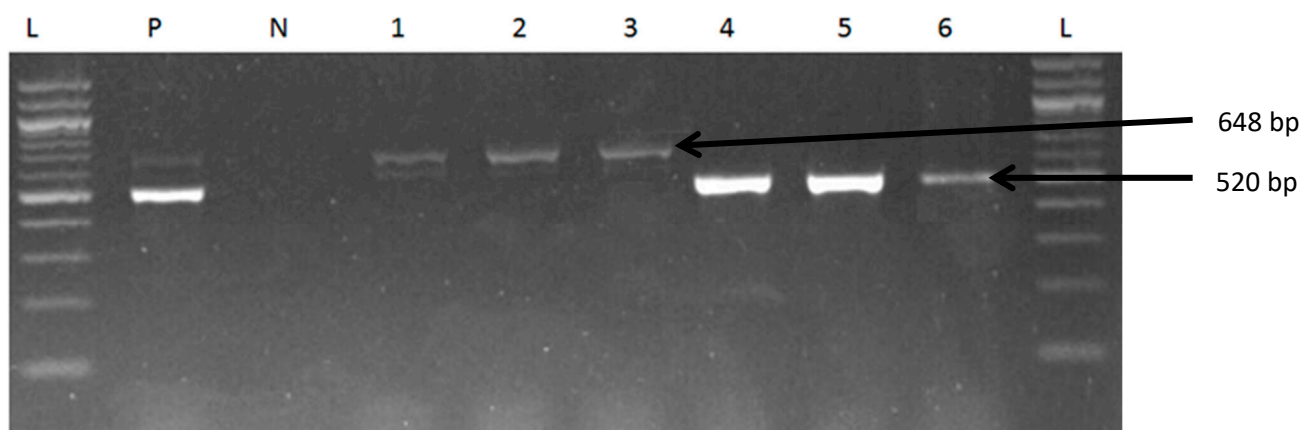

**Figure S7C:** A gel electrophoresis showing beta-lactamases genes in *A. baumannii*. Lane 1-3= *bla<sub>VEB</sub>* (648 bp) and Lane 4-6 = *bla<sub>PER</sub>* (520 bp) genes.

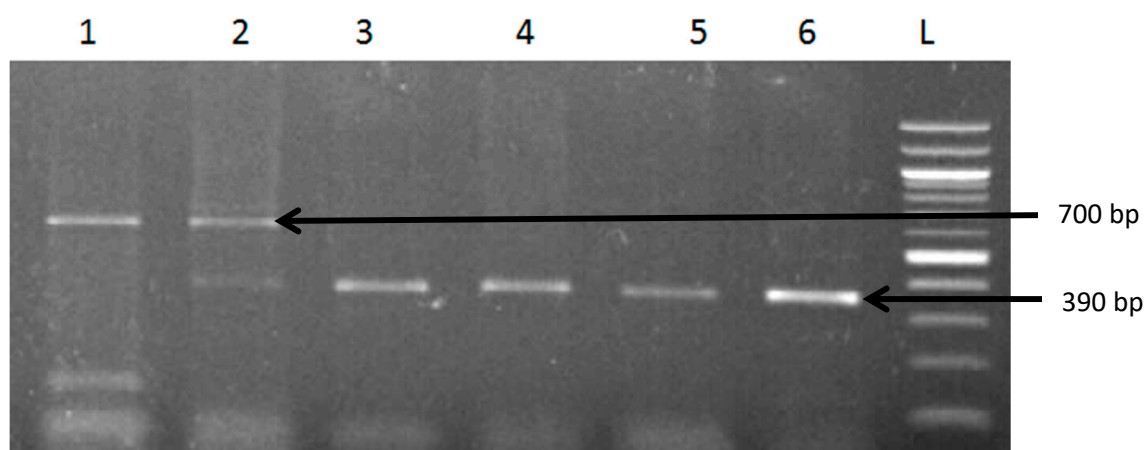

**Figure S7D:** A gel electrophoresis showing beta-lactamases genes in *A. baumannii*. L= Ladder (100bp), Lanes 1 and 2 = *bla<sub>KPC</sub>* (700 bp) and Lanes 3-6= *bla<sub>VIM</sub>* (390 bp). There were no positive and negative controls.

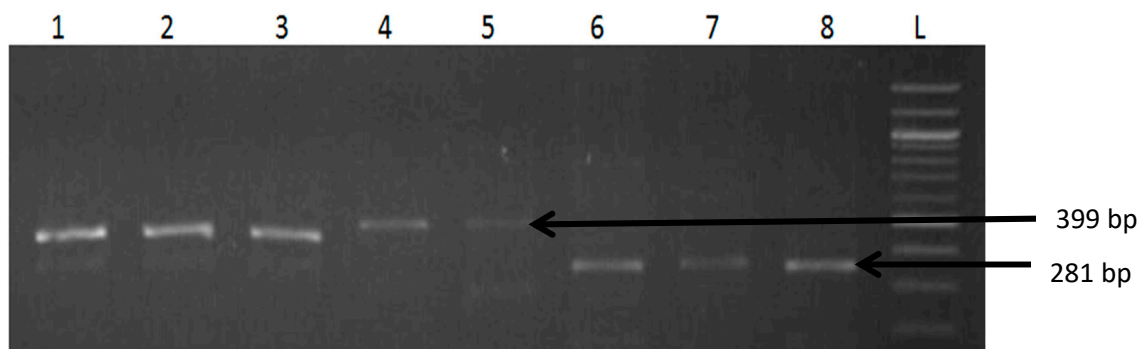

**Figure S7E:** A gel electrophoresis showing beta-lactamases genes in *A. baumannii*. L= Ladder (100bp); Lanes 1-5= *bla<sub>GES</sub>* (399 bp) and Lanes 6-8= *bla<sub>OXA-48-like</sub>* (281 bp). There were no positive and negative controls for both genes.

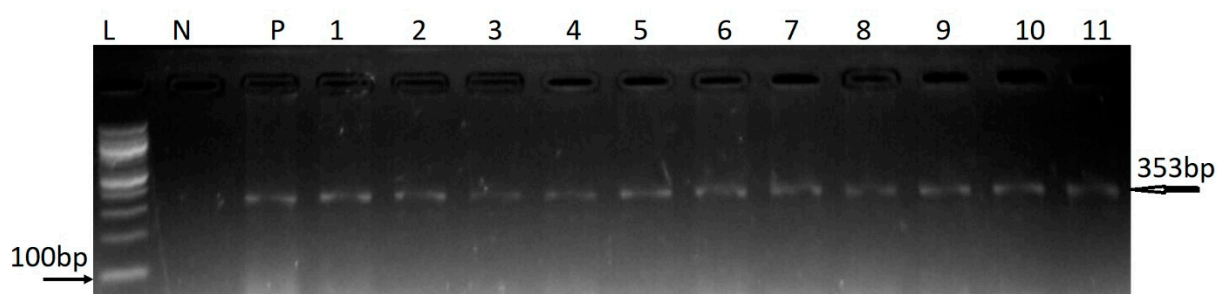

**Figure S7F:** A gel electrophoresis showing beta-lactamases genes in *A. baumannii*. L= Ladder (100bp); Lanes N = Negative control and Lanes P= Positive control. Lane 1-11= *bla<sub>OXA-51</sub>* (353bp).

## Supplementary Tables

**Table S1:** Phenotypic antibiotic resistance of *A. baumannii* recovered from each of the site where that water samples were collected along Great Fish, Kieskamma and Tyhume River. S, R and I stand for susceptible, resistance and intermediate resistance respectively.

| Site | Isolates code | Resistance Phenotypes |     |     |     |     |    |     |     |     |     |     |
|------|---------------|-----------------------|-----|-----|-----|-----|----|-----|-----|-----|-----|-----|
|      |               | AK                    | CPM | CTX | CAZ | CIP | GM | IMI | MEM | PTZ | TET | SXT |
| TY1  | 1             | S                     | S   | S   | S   | S   | S  | S   | S   | S   | S   | S   |
| TY1  | 20            | S                     | S   | R   | S   | S   | S  | S   | R   | S   | S   | S   |
| TY2  | 22            | S                     | S   | I   | S   | S   | S  | S   | S   | S   | S   | S   |
| TY2  | 23            | S                     | S   | I   | S   | S   | S  | S   | S   | S   | S   | S   |
| TY2  | 26            | S                     | S   | S   | S   | S   | S  | S   | S   | S   | S   | S   |
| TY2  | 28            | S                     | S   | I   | S   | S   | S  | S   | S   | S   | S   | S   |
| TY2  | 38            | S                     | S   | I   | S   | I   | S  | S   | S   | S   | S   | R   |
| TY3  | 43            | S                     | S   | I   | S   | S   | S  | S   | S   | S   | S   | S   |
| TY3  | 44            | S                     | S   | I   | S   | S   | S  | S   | S   | S   | S   | S   |
| TY3  | 49            | S                     | S   | I   | S   | S   | S  | S   | S   | S   | S   | S   |
| TY3  | 52            | S                     | S   | I   | S   | S   | S  | S   | S   | S   | S   | S   |
| TY3  | 53            | S                     | S   | I   | S   | S   | S  | S   | S   | S   | S   | S   |
| TY3  | 55            | S                     | S   | I   | I   | S   | S  | S   | S   | S   | S   | S   |
| TY4  | 63            | S                     | S   | I   | I   | S   | S  | S   | S   | I   | S   | S   |
| TY4  | 64            | S                     | S   | R   | S   | I   | S  | S   | S   | S   | S   | S   |
| TY4  | 68            | S                     | S   | I   | S   | S   | S  | S   | S   | S   | I   | S   |
| TY4  | 69            | S                     | S   | I   | S   | S   | S  | S   | S   | S   | S   | S   |
| TY4  | 72            | S                     | S   | I   | I   | S   | S  | S   | S   | I   | S   | S   |
| TY4  | 75            | S                     | S   | I   | S   | S   | S  | S   | S   | S   | S   | S   |
| TY4  | 76            | S                     | S   | I   | S   | S   | S  | S   | S   | S   | S   | S   |
| TY5  | 80            | S                     | S   | S   | S   | S   | S  | S   | S   | S   | S   | S   |
| TY5  | 81            | S                     | S   | I   | S   | I   | S  | S   | S   | S   | S   | S   |
| TY5  | 83            | S                     | S   | I   | S   | S   | S  | S   | S   | S   | S   | R   |
| TY5  | 84            | S                     | S   | S   | S   | S   | S  | S   | S   | S   | S   | S   |
| TY5  | 85            | S                     | S   | I   | S   | S   | S  | S   | S   | S   | S   | S   |
| TY5  | 87            | S                     | S   | I   | S   | S   | S  | S   | S   | S   | S   | S   |
| TY5  | 88            | S                     | S   | S   | S   | S   | S  | S   | S   | S   | S   | S   |
| TY5  | 90            | S                     | S   | S   | S   | S   | S  | S   | S   | S   | S   | S   |
| TY5  | 91            | S                     | S   | I   | S   | S   | S  | S   | S   | S   | S   | S   |
| TY5  | 92            | S                     | S   | I   | S   | S   | S  | S   | S   | S   | S   | R   |
| TY5  | 93            | S                     | S   | I   | S   | S   | S  | S   | S   | S   | S   | S   |
| TY5  | 99            | S                     | S   | I   | S   | S   | S  | S   | S   | S   | S   | S   |
| KE1  | 106           | S                     | S   | I   | S   | S   | S  | S   | S   | S   | S   | R   |
| KE1  | 107           | S                     | S   | I   | S   | S   | S  | S   | S   | S   | S   | R   |
| KE4  | 127           | S                     | S   | I   | S   | S   | S  | S   | S   | S   | S   | S   |
| GF2  | 153           | S                     | S   | I   | S   | S   | S  | S   | S   | S   | S   | R   |

|     |     |   |   |   |   |   |   |   |   |   |   |   |
|-----|-----|---|---|---|---|---|---|---|---|---|---|---|
| GF2 | 154 | S | S | I | S | S | S | S | S | S | S | S |
| GF2 | 156 | S | S | I | S | S | S | S | S | S | I | R |
| GF2 | 159 | S | S | R | S | I | S | S | I | I | I | R |
| GF3 | 167 | S | S | I | S | S | S | S | S | S | I | S |
| GF3 | 170 | S | S | S | S | S | S | S | S | S | S | S |
| GF4 | 174 | S | S | I | S | S | S | S | S | S | S | R |
| GF4 | 176 | S | S | I | S | S | S | S | S | S | S | S |
| GF5 | 179 | S | S | I | S | S | S | S | S | I | I | R |
| GF1 | 187 | S | S | I | S | S | S | S | S | S | S | R |
| GF1 | 188 | S | I | R | I | I | S | S | S | I | S | S |
| GF1 | 195 | S | S | I | I | S | S | S | S | I | S | S |
| GF1 | 198 | S | S | I | S | S | S | S | S | S | S | S |
| GF2 | 208 | S | S | I | S | S | S | S | S | S | S | S |
| GF2 | 209 | S | S | R | S | I | S | S | S | S | S | S |
| GF2 | 213 | S | S | I | S | S | I | S | S | R | S | S |
| GF2 | 214 | S | S | I | S | S | S | S | S | S | S | S |
| GF2 | 216 | S | S | I | S | S | S | S | S | S | S | S |
| GF3 | 227 | S | S | S | S | S | S | S | S | S | S | S |
| GF4 | 232 | S | S | I | S | R | S | S | S | S | S | R |
| GF4 | 235 | S | S | I | S | S | S | S | S | S | S | S |
| GF4 | 236 | S | S | I | S | S | S | S | S | R | S | S |
| GF4 | 242 | S | S | I | S | S | S | S | S | S | S | I |
| GF4 | 243 | S | S | I | S | S | S | S | S | S | S | S |
| GF4 | 245 | S | S | I | S | I | S | S | S | S | S | S |
| GF4 | 246 | S | S | I | I | I | S | S | S | I | S | S |
| GF4 | 247 | S | S | I | S | S | S | S | S | S | S | S |
| GF4 | 249 | S | S | I | S | S | S | S | S | S | S | S |
| GF4 | 250 | S | S | I | S | S | S | S | S | S | S | S |
| GF5 | 256 | S | S | I | S | I | S | S | S | S | S | S |
| TY3 | 272 | S | S | I | S | S | S | S | S | S | S | S |
| TY3 | 273 | S | S | I | S | I | S | S | S | S | S | S |
| TY3 | 274 | S | S | I | S | I | S | S | S | I | S | S |
| TY3 | 278 | S | S | I | S | I | S | S | S | S | S | S |
| TY3 | 279 | S | S | I | S | S | S | S | S | S | S | S |
| TY3 | 282 | S | S | I | S | S | S | S | S | S | S | S |
| TY3 | 283 | S | S | I | S | I | S | S | S | S | S | S |
| TY3 | 286 | S | S | I | S | S | S | S | S | S | S | S |
| TY3 | 289 | S | S | I | S | S | S | S | S | S | S | S |
| TY3 | 290 | S | S | I | S | I | S | S | S | I | S | S |
| TY3 | 294 | S | S | I | S | I | S | S | S | S | S | S |
| TY5 | 303 | S | S | I | S | I | S | S | S | S | S | S |
| KE1 | 306 | S | S | I | I | S | S | S | S | S | S | S |
| KE1 | 308 | S | S | I | S | S | S | S | S | I | S | S |

|     |     |   |   |   |   |   |   |   |   |   |   |   |
|-----|-----|---|---|---|---|---|---|---|---|---|---|---|
| KE1 | 309 | S | S | S | S | S | S | S | S | S | S | S |
| KE1 | 315 | S | S | I | S | S | S | S | S | S | S | S |
| KE1 | 316 | S | S | I | I | I | S | S | S | S | S | S |
| KE2 | 319 | S | S | I | S | S | S | S | S | I | S | S |
| KE4 | 333 | S | S | I | S | S | S | S | S | S | S | S |
| TY2 | 346 | S | S | I | S | S | S | S | S | S | S | S |
| TY2 | 348 | S | S | S | S | S | S | S | S | S | I | S |
| TY2 | 353 | S | S | I | I | S | S | S | S | I | S | S |
| TY2 | 356 | S | R | I | S | S | S | S | S | S | S | S |
| TY2 | 358 | S | S | I | S | S | S | S | S | S | S | S |
| TY3 | 361 | S | S | I | I | I | S | S | S | S | S | S |
| TY3 | 364 | S | S | I | S | I | S | S | S | S | S | S |
| TY3 | 367 | S | S | I | I | I | S | S | S | I | S | S |
| TY3 | 369 | S | S | I | I | S | S | S | S | S | S | S |
| TY3 | 370 | S | S | I | I | S | S | S | S | S | S | S |
| TY3 | 372 | S | S | I | S | S | S | S | S | S | S | S |
| TY3 | 373 | S | S | I | S | S | S | S | S | S | S | S |
| TY3 | 374 | S | S | I | I | S | S | S | R | S | S | S |
| TY3 | 378 | S | S | I | S | I | S | S | S | S | S | S |
| TY3 | 380 | S | R | I | S | I | S | S | S | S | S | S |
| TY3 | 382 | S | S | I | I | S | S | S | S | S | S | S |
| TY3 | 385 | R | R | R | R | R | R | S | S | S | S | S |
| TY3 | 386 | R | R | R | R | R | R | S | S | R | S | S |
| TY4 | 388 | R | R | R | R | R | I | S | R | R | R | R |
| TY4 | 389 | S | S | I | I | S | S | S | S | S | S | S |
| TY4 | 394 | S | S | R | I | S | S | S | S | S | S | I |
| TY4 | 396 | S | S | I | S | S | S | S | S | S | S | S |
| TY4 | 397 | S | S | R | I | S | S | S | S | I | S | I |
| TY4 | 398 | S | R | R | I | R | S | S | S | R | R | S |
| TY4 | 401 | S | S | I | I | S | S | S | S | S | S | S |
| TY4 | 404 | S | S | I | S | S | S | S | S | S | S | S |
| TY4 | 406 | S | S | I | S | S | S | S | S | S | S | S |
| TY4 | 407 | S | S | I | I | I | S | S | S | I | S | I |
| TY4 | 409 | S | S | R | R | S | S | S | S | I | S | S |
| TY4 | 413 | S | R | I | I | S | S | S | I | S | S | S |
| TY4 | 415 | S | S | R | I | I | S | S | R | S | S | I |
| TY4 | 422 | R | S | R | I | S | S | S | S | R | S | I |
| TY5 | 431 | S | S | R | I | S | S | S | S | R | S | S |
| TY5 | 432 | S | S | I | S | I | S | S | S | S | S | S |
| TY5 | 433 | S | S | I | I | S | S | S | S | S | S | S |
| TY5 | 434 | S | S | R | R | S | S | S | S | I | S | S |
| TY5 | 436 | S | S | I | I | S | S | S | S | S | I | S |
| GF1 | 441 | S | S | I | S | S | S | S | S | S | S | S |

|     |     |   |   |   |   |   |   |   |   |   |   |   |
|-----|-----|---|---|---|---|---|---|---|---|---|---|---|
| GF2 | 444 | S | S | I | S | S | S | S | S | S | S | S |
| GF2 | 449 | S | S | I | S | S | S | S | S | R | S | S |
| GF2 | 450 | S | S | I | I | R | S | S | S | S | S | S |
| GF3 | 454 | S | S | I | S | S | S | S | S | R | S | S |
| GF3 | 455 | S | S | I | S | S | S | S | S | R | I | S |
| GF3 | 456 | S | S | I | I | S | S | S | S | I | S | I |
| GF4 | 459 | S | S | I | S | S | S | S | S | I | S | R |
| GF4 | 460 | S | S | I | S | S | S | S | S | S | S | I |
| GF4 | 461 | S | S | R | I | S | S | S | S | I | I | R |
| GF5 | 463 | S | S | R | I | S | S | S | S | I | I | R |
| GF5 | 464 | S | S | R | I | S | S | S | S | S | S | R |
| GF5 | 465 | S | S | R | I | S | S | S | S | I | S | R |
| GF5 | 466 | S | R | I | S | S | S | S | S | S | S | I |
| GF5 | 467 | S | S | I | S | S | S | S | S | S | S | S |
| GF5 | 468 | S | S | R | I | S | S | S | S | I | S | I |
| GF5 | 469 | S | S | R | I | R | S | S | I | I | S | I |
| GF5 | 471 | S | S | R | S | R | S | S | S | I | S | I |
| GF5 | 473 | S | I | R | I | R | S | S | S | R | S | I |
| KE2 | 475 | S | S | I | I | I | S | S | S | I | S | S |
| KE2 | 477 | S | S | R | I | I | S | S | S | I | S | S |
| KE2 | 481 | S | I | R | I | I | S | S | S | S | S | R |
| KE2 | 482 | S | S | I | I | I | S | S | S | R | S | S |
| KE2 | 484 | S | S | R | I | I | S | S | S | I | R | S |
| KE2 | 485 | S | S | R | I | I | S | S | S | I | R | I |
| KE2 | 486 | S | S | I | I | I | S | S | S | I | S | S |
| KE2 | 489 | S | S | I | S | S | S | S | S | R | S | S |
| KE2 | 490 | S | S | R | I | I | S | S | S | I | S | I |
| KE3 | 494 | S | R | I | S | I | S | S | S | S | S | S |
| KE3 | 496 | S | S | S | S | S | S | S | S | S | S | S |
| KE3 | 497 | S | S | I | S | S | S | S | S | S | S | S |
| KE3 | 499 | S | I | I | I | S | S | S | R | S | S | S |
| KE4 | 501 | S | S | I | S | S | S | S | S | S | S | S |
| KE5 | 504 | S | S | I | S | S | S | S | S | S | S | S |
| TY2 | 505 | S | S | I | S | S | S | S | S | S | S | S |
| TY2 | 509 | S | S | I | S | I | S | S | S | S | S | S |
| TY2 | 510 | S | S | I | S | I | S | S | S | S | S | S |
| TY2 | 511 | S | S | S | S | I | S | S | S | S | S | S |
| TY3 | 513 | S | S | I | I | S | S | S | S | R | R | R |
| TY3 | 514 | S | S | I | I | S | S | S | S | S | S | S |
| TY3 | 515 | S | S | I | I | S | S | S | S | S | S | I |
| TY3 | 516 | R | S | I | I | S | S | S | S | S | S | S |
| TY4 | 519 | S | S | I | S | S | S | S | S | S | S | S |
| TY4 | 520 | R | S | I | I | R | S | S | S | I | S | I |

|     |     |   |   |   |   |   |   |   |   |   |   |   |
|-----|-----|---|---|---|---|---|---|---|---|---|---|---|
| TY5 | 523 | S | S | I | S | S | S | S | S | S | S | S |
| TY5 | 524 | S | S | I | S | S | S | S | S | S | S | S |
| TY5 | 527 | S | S | I | S | S | S | S | S | S | S | S |
| TY5 | 528 | S | S | I | S | S | S | S | S | S | S | S |
| TY5 | 529 | S | R | R | R | S | S | S | S | I | S | S |
| TY5 | 531 | S | R | R | R | S | S | S | S | I | R | S |
| KE2 | 536 | S | R | R | R | I | R | S | I | R | S | R |
| KE2 | 537 | S | R | I | R | S | R | S | S | S | R | R |
| KE2 | 538 | S | S | I | R | R | R | I | I | R | R | R |
| KE2 | 539 | S | R | R | R | S | R | S | S | I | I | R |
| KE2 | 540 | S | S | I | S | R | R | I | R | R | R | R |
| KE2 | 541 | S | S | I | S | R | S | S | I | R | R | R |
| KE2 | 542 | S | S | I | S | R | S | S | S | I | R | R |
| KE3 | 543 | S | S | I | S | S | S | S | S | S | S | S |
| KE3 | 544 | R | S | I | S | S | S | S | S | S | S | S |
| KE3 | 545 | S | S | I | S | S | S | S | S | S | S | S |
| KE3 | 546 | S | S | R | S | R | S | S | S | S | S | S |
| KE3 | 547 | S | S | R | R | R | R | S | S | S | R | R |
| KE3 | 548 | S | S | I | S | S | S | S | S | S | S | S |
| KE3 | 549 | S | S | I | S | S | S | S | R | R | S | S |
| GF1 | 556 | S | S | I | S | S | S | S | I | I | S | R |
| GF1 | 557 | S | S | I | S | S | S | S | S | S | I | S |
| GF1 | 559 | S | S | I | S | S | S | S | S | S | I | S |
| GF2 | 560 | S | S | I | S | S | S | S | S | R | S | S |
| GF3 | 564 | S | S | I | S | S | S | S | S | S | S | S |
| GF3 | 565 | S | S | I | S | S | S | S | S | I | S | S |
| GF3 | 567 | S | S | I | S | S | S | S | S | S | S | S |
| GF3 | 568 | S | S | I | S | S | S | S | S | S | S | S |
| GF3 | 569 | S | S | I | S | S | S | S | S | S | S | S |
| GF4 | 570 | S | S | S | S | S | S | S | S | S | S | S |
| GF4 | 571 | S | S | S | S | S | S | S | S | S | S | S |
| GF4 | 573 | S | S | S | S | S | S | S | S | S | S | S |
| GF4 | 574 | S | S | I | S | S | S | S | S | S | I | S |
| GF5 | 575 | S | S | I | S | S | S | S | S | S | S | S |
| GF5 | 576 | S | S | I | S | S | S | S | S | S | S | S |
| GF5 | 577 | S | S | I | S | S | S | S | S | S | S | S |
| GF5 | 578 | S | S | I | S | S | S | S | S | S | S | S |
| GF5 | 580 | S | S | I | S | S | S | S | S | S | S | S |
| GF5 | 582 | S | S | I | S | S | S | S | S | S | S | S |
| KE1 | 583 | S | S | I | S | S | S | S | S | S | S | S |
| KE1 | 586 | S | S | I | S | S | S | S | S | I | S | S |
| KE2 | 591 | S | R | R | R | R | R | S | I | R | R | R |
| KE2 | 592 | S | R | R | R | R | R | S | S | R | R | R |

[illegible]

|     |     |   |   |   |   |   |   |   |   |   |   |   |
|-----|-----|---|---|---|---|---|---|---|---|---|---|---|
| TY2 | 717 | S | S | S | S | S | S | S | S | S | S | S |
| TY2 | 718 | S | S | S | S | S | S | S | S | S | S | S |
| TY2 | 719 | S | S | S | S | S | S | S | S | S | S | S |
| TY2 | 720 | S | R | R | R | S | S | S | S | R | R | S |
| TY2 | 723 | S | S | S | S | S | S | S | S | S | S | S |
| TY2 | 724 | S | S | S | S | S | S | S | S | S | S | S |
| TY3 | 725 | S | S | S | S | S | S | S | S | S | S | S |
| TY3 | 726 | S | S | I | S | S | S | S | S | S | S | S |
| TY3 | 727 | S | S | S | S | S | S | S | S | S | S | S |
| TY3 | 728 | S | S | S | S | S | S | S | S | S | S | S |
| TY4 | 729 | S | S | S | S | S | S | S | S | S | S | S |
| TY4 | 730 | S | S | S | S | S | S | S | S | S | S | S |
| TY5 | 734 | S | S | S | S | S | S | S | S | S | S | S |
| TY5 | 735 | S | S | S | S | I | S | S | S | S | I | S |
| TY5 | 736 | S | I | S | S | S | S | S | S | S | S | S |
| TY5 | 738 | S | S | S | S | S | S | S | S | S | S | R |
| KE1 | 739 | S | S | I | I | S | S | S | S | S | S | S |
| KE1 | 740 | S | S | S | S | S | S | S | S | S | S | S |
| KE1 | 741 | S | S | S | S | S | S | S | S | S | S | S |
| KE3 | 756 | S | S | R | R | R | R | S | S | S | R | R |
| TY1 | 757 | S | S | I | I | I | I | S | S | S | S | R |
| TY1 | 758 | S | S | S | R | S | S | S | S | S | S | S |
| TY2 | 761 | S | S | S | S | S | S | S | S | S | S | S |
| TY2 | 765 | S | S | I | S | S | S | S | S | S | S | R |
| TY4 | 771 | S | S | S | S | S | S | S | S | S | S | S |
| TY4 | 772 | S | S | S | S | S | S | S | S | S | S | S |
| GF1 | 779 | S | S | I | S | S | S | S | S | S | S | S |
| GF2 | 781 | S | S | I | S | S | S | S | S | I | S | R |
| GF2 | 782 | S | S | I | S | S | S | S | S | S | S | S |
| GF2 | 783 | S | I | I | S | S | S | S | S | S | R | R |
| GF2 | 786 | S | S | I | S | S | S | S | S | S | S | S |
| GF2 | 789 | S | S | I | S | S | S | S | S | S | S | S |
| GF3 | 791 | S | S | I | S | S | S | S | S | S | I | R |
| GF3 | 793 | S | S | I | S | S | S | S | S | S | S | S |
| GF4 | 795 | S | S | I | S | S | S | R | R | I | R | S |
| GF4 | 796 | S | S | I | S | S | S | S | S | S | S | S |
| GF4 | 798 | S | S | I | S | S | S | S | S | S | S | S |
| GF4 | 799 | S | S | I | S | S | S | S | S | S | S | S |
| GF4 | 800 | S | R | R | R | R | S | S | S | R | R | R |
| GF4 | 801 | S | S | S | S | S | S | S | S | S | S | S |
| GF5 | 802 | S | R | R | R | R | S | S | S | R | R | R |
| GF5 | 803 | S | S | I | S | I | S | S | S | S | I | S |
| GF5 | 804 | S | S | I | S | S | S | S | S | S | S | S |

[illegible]

|     |      |   |   |   |   |   |   |   |   |   |   |   |
|-----|------|---|---|---|---|---|---|---|---|---|---|---|
| GF5 | 890  | S | S | I | S | S | S | R | R | S | S | S |
| TY1 | 892  | S | S | S | S | S | S | S | S | S | S | S |
| TY1 | 893  | S | R | R | R | R | S | S | S | R | R | R |
| TY1 | 894  | S | S | I | S | S | S | S | S | S | R | R |
| TY2 | 896  | S | S | I | S | S | S | R | R | S | R | S |
| TY2 | 897  | S | S | I | S | S | S | S | S | S | R | R |
| TY2 | 898  | S | S | I | S | S | S | R | R | I | R | R |
| TY2 | 899  | S | S | S | S | S | S | I | S | S | S | S |
| TY2 | 900  | S | S | S | S | S | S | I | S | S | S | S |
| TY2 | 901  | S | S | I | S | S | S | R | R | S | I | S |
| KE1 | 906  | S | S | S | S | S | S | S | S | S | S | S |
| KE2 | 909  | S | S | S | S | S | S | S | S | S | R | S |
| KE2 | 911  | S | S | I | R | S | R | S | S | S | S | R |
| KE3 | 913  | S | S | S | S | S | S | S | S | S | I | S |
| KE3 | 914  | S | S | S | S | I | S | S | S | S | S | S |
| KE4 | 916  | S | S | I | S | S | S | S | S | S | S | S |
| KE5 | 918  | S | S | I | R | S | R | S | S | S | S | R |
| KE5 | 919  | S | S | S | S | S | S | S | S | I | S | S |
| GF1 | 920  | S | S | I | S | S | S | S | S | S | S | S |
| GF1 | 922  | S | S | S | S | S | S | S | S | S | S | S |
| GF1 | 923  | S | S | I | S | S | S | S | S | S | S | S |
| GF1 | 924  | S | S | I | S | S | S | S | S | S | S | S |
| GF2 | 928  | S | S | S | S | S | S | S | S | S | S | S |
| GF3 | 930  | S | S | S | S | S | S | S | S | S | I | S |
| GF4 | 931  | S | S | R | I | S | R | S | S | S | S | R |
| GF4 | 932  | S | S | S | S | S | S | S | S | S | R | S |
| GF4 | 933  | S | S | S | S | S | S | S | S | S | R | R |
| GF4 | 934  | S | S | R | S | S | S | S | S | S | R | R |
| GF4 | 935  | S | S | S | S | S | S | S | S | S | R | R |
| GF5 | 936  | S | S | S | S | S | S | S | S | S | S | S |
| GF5 | 937  | S | S | I | S | S | S | S | S | S | S | S |
| GF5 | 938  | S | S | I | S | S | S | S | S | S | S | S |
| TY1 | 940  | S | S | I | S | S | S | S | S | S | S | S |
| TY2 | 944  | S | S | I | S | S | S | S | S | S | I | S |
| TY2 | 945  | S | S | I | S | S | S | S | S | I | S | S |
| TY3 | 949  | S | S | I | S | S | S | S | S | S | I | S |
| TY4 | 954  | S | S | I | S | S | S | S | S | I | S | S |
| TY4 | 955  | S | S | S | S | S | S | S | S | S | I | S |
| TY5 | 956  | S | S | R | I | I | S | S | S | I | I | S |
| TY5 | 957  | S | S | R | I | I | S | S | S | I | R | S |
| TY5 | 958  | S | S | R | I | I | S | S | S | R | I | S |
| GF4 | 1019 | S | R | R | R | I | S | R | R | R | R | R |
| GF4 | 1020 | S | R | R | R | I | S | R | R | R | R | R |

|     |      |   |   |   |   |   |   |   |   |   |   |   |
|-----|------|---|---|---|---|---|---|---|---|---|---|---|
| GF4 | 1022 | S | I | I | R | I | S | S | S | S | S | S |
| GF5 | 1023 | S | S | R | R | S | S | S | S | I | S | S |
| GF5 | 1024 | S | R | R | R | S | R | S | S | I | S | R |
| GF5 | 1025 | S | S | R | R | S | R | S | S | S | S | R |
| GF5 | 1026 | S | I | R | R | R | R | S | S | R | R | R |
| TY1 | 1027 | S | R | R | R | R | R | S | S | R | R | R |
| TY1 | 1028 | S | R | R | R | R | R | S | S | R | R | R |
| TY2 | 1031 | S | S | R | I | S | S | S | S | I | I | S |
| TY2 | 1032 | S | S | R | I | I | S | S | S | R | R | R |
| TY3 | 1035 | S | R | R | I | R | R | S | S | R | R | R |
| TY4 | 1041 | S | S | R | I | I | S | S | S | I | I | S |
| TY4 | 1042 | S | S | I | I | S | S | S | S | S | I | S |
| TY5 | 1045 | S | S | I | I | S | S | S | S | S | S | S |
| TY5 | 1046 | S | S | I | I | S | S | S | S | S | I | S |
| KE1 | 1047 | S | S | I | S | S | S | S | S | S | I | S |
| KE1 | 1049 | S | S | I | S | S | S | S | S | S | S | S |
| KE2 | 1053 | S | S | I | S | S | S | S | S | S | S | S |
| KE2 | 1054 | S | S | I | I | S | S | S | S | I | S | S |
| KE3 | 1055 | S | S | I | I | S | S | S | S | I | S | S |
| KE3 | 1056 | S | S | I | I | S | S | S | S | S | S | S |
| KE3 | 1057 | S | S | I | I | S | S | S | S | I | S | S |
| KE3 | 1058 | S | S | I | I | S | S | S | S | S | S | S |
| KE4 | 1059 | S | S | R | I | I | S | S | S | I | S | S |
| KE4 | 1060 | S | S | I | S | I | S | S | S | I | I | S |
| KE4 | 1061 | S | S | I | S | S | S | S | S | S | S | S |
| KE4 | 1062 | S | S | I | S | S | S | S | S | I | S | S |
| KE5 | 1063 | S | S | I | S | S | S | S | S | S | S | S |
| KE5 | 1064 | S | S | I | S | S | S | S | S | I | S | S |
| KE5 | 1065 | S | S | I | I | S | S | S | S | S | S | S |
| KE5 | 1066 | S | S | I | S | S | S | S | S | S | S | S |

**Table S2: Screening of *A. baumannii* that exhibited phenotypic resistance for antibiotics resistant genes**

| Antimicrobial Family | Primer Name                 | PCR primer sequence (5'-3')                             | Amplicon size (bp) | Gene name                     | PCR cycling condition                                                                                                                                                               | Reference |
|----------------------|-----------------------------|---------------------------------------------------------|--------------------|-------------------------------|-------------------------------------------------------------------------------------------------------------------------------------------------------------------------------------|-----------|
| Aminoglycosides      | aph(3)-Ia ( <i>aphA1</i> )  | F: ATGGGCTCGCGATAATGTC<br>R: CTCACCGAGGCAGTTCCAT        | 600                | <i>apHA1</i>                  | Initial denaturation step: 94°C for 5 min, followed by 30 cycles of 94°C for 30 s, annealing step: 50°C for 30 s and 72°C for 1.5 min and final elongation at 72°C for 5 min        | [1]       |
|                      | aph(3)-IIa ( <i>aphA2</i> ) | F: GAACAAGATGGATTGCACGC<br>R: GCTCTTCAGCAATATCACGG      | 510                | <i>apHA2</i>                  | Initial denaturation step: 94°C for 5 min, followed by 30 cycles of 94°C for 30 s, annealing step: 50°C for 30 s and 72°C for 1.5 min and final elongation at 72°C for 5 min        | [1]       |
| Beta-lactamases      | MultiTSO-T                  | F: CATTTCGGTGTGCGCCCTTATTC<br>R: CGTTCATCCATAGTTGCCTGAC | 800                | <i>bla<sub>TEM</sub></i>      | Initial denaturation step: 94°C for 10 min, followed by 30 cycles of 94°C for 40 s, annealing step: 60°C for 40 s and 72°C for 1 min; and a final elongation step at 72°C for 7 min | [2]       |
|                      | MultiTSO-S                  | F: AGCCGCTTGAGCAAATTAAAC<br>R: ATCCCGCAGATAAATCACCAC    | 713                | <i>bla<sub>SHV</sub></i>      | Initial denaturation step: 94°C for 10 min, followed by 30 cycles of 94°C for 40 s, annealing step: 60°C for 40 s and 72°C for 1 min; and final elongation step at 72°C for 7 min   | [2]       |
|                      | MultiCTXMGp 1               | F: TTAGGAARTGTGCCGCTGYA<br>R: CGATATCGTTGGTGGTRCCAT     | 688                | <i>bla<sub>CTX-M(1)</sub></i> | Initial denaturation step: 94°C for 10 min, followed by 30 cycles of 94°C for 40 s, annealing step: 60°C for 40 s and 72°C for 1 min; and final elongation step at 72°C for 7 min   | [2]       |

|  |                  |                                                    |     |                                   |                                                                                                                                                                                    |     |
|--|------------------|----------------------------------------------------|-----|-----------------------------------|------------------------------------------------------------------------------------------------------------------------------------------------------------------------------------|-----|
|  | MultiCTXMGp<br>2 | F: CGTTAACGGCACGATGAC<br>R: CGATATCGTTGGTGGTRCCAT  | 404 | <i>bla</i> <sub>CTX-M(2)</sub>    | Initial denaturation step: 94°C for 10 min, followed by 30 cycles of 94°C for 40 s, annealing step: 60°C for 40 s and 72°C for 1 min; and final elongation step at 72°C for 7 min  | [2] |
|  | MultiCTXMGp<br>9 | F: TCAAGCCTGCCGATCTGGT<br>R: TGATTCTCGCCGCTGAAG    | 561 | <i>bla</i> <sub>CTX-M(9)</sub>    | Initial denaturation step: 94°C for 10 min, followed by 30 cycles of 94°C for 40 s, annealing step: 60°C for 40 s and 72°C for 1 min; and final elongation step at 72°C for 7 min  | [2] |
|  | CTX-Mg8/25       | F: AACRCRCAGACGCTCTAC<br>R: TCGAGCCGGAASGTGTAT     | 326 | <i>bla</i> <sub>CTX-M-8/-25</sub> | Initial denaturation step: 94°C for 10 min, followed by 30 cycles of 94°C for 40 s, annealing step: 60°C for 40 s and 72°C for 1 min; and final elongation step at 72°C for 7 min  | [2] |
|  | MultiGES         | F: AGTCGGCTAGACCGGAAAG<br>R: TTTGTCCGTGCTCAGGAT    | 399 | <i>bla</i> <sub>GES</sub>         | Initial denaturation step: 94°C for 10 min, followed by 30 cycles of 94°C for 40 s, annealing step: 57°C for 40 s and 72°C for 1 min; and final elongation step at 72°C for 7 min  | [2] |
|  | MultiOXA-48      | F: GCTTGATCGCCCTCGATT<br>R: GATTTGCTCCGTGGCCGAAA   | 281 | <i>bla</i> <sub>OXA-48-like</sub> | Initial denaturation step: 94°C for 10 min, followed by 30 cycles of 94°C for 40 s, annealing step: 57°C for 40 s and 72°C for 1 min; and final elongation step at 72°C for 7 mins | [2] |
|  | OXA-51           | F: TAATGCTTTGATCGGCCTTG<br>R: TGGATTGCACTTCATCTTGG | 353 | <i>bla</i> <sub>OXA-51-like</sub> | Initial denaturation step: 95°C for 1 min, followed by 30 cycles of 95°C for 15 s, annealing step: 52°C for 15 s and 72°C for 10 s; and final elongation step at 72°C for 10 mins  | [3] |
|  | OXA-23           | F: GATCGGATTGGAGAACCAGA<br>R: ATTCTTGACCGCATTTCCAT | 501 | <i>bla</i> <sub>OXA-23-like</sub> |                                                                                                                                                                                    |     |
|  | OXA-40           | F: GGTTGTTGGCCCCCTTAAA<br>R: AGTTGAGCGAAAAGGGGATT  | 246 | <i>bla</i> <sub>OXA-40-like</sub> |                                                                                                                                                                                    |     |
|  | OXA-58           | F: AAGTATTGGGGCTTGTGCTG<br>R: CCCCTCTGCGCTCTACATAC | 599 | <i>bla</i> <sub>OXA-58-like</sub> |                                                                                                                                                                                    |     |

|                  |          |                                                      |     |                          |                                                                                                                                                                                     |     |
|------------------|----------|------------------------------------------------------|-----|--------------------------|-------------------------------------------------------------------------------------------------------------------------------------------------------------------------------------|-----|
|                  | MultiPER | F: GCTCCGATAATGAAAGCGT<br>R: TTCGGCTTGACTCGGCTGA     | 520 | <i>bla<sub>PER</sub></i> | Initial denaturation step: 94°C for 10 mins, followed by 30 cycles of 94°C for 40 s, annealing step: 60°C for 40 s and 72°C for 1 min; and final elongation step at 72°C for 7 mins | [2] |
|                  | MultiVEB | F: CATTTCCTCGATGCAAAGCGT<br>R: CGAAGTTTCTTTGGACTCTG  | 648 | <i>bla<sub>VEB</sub></i> | Initial denaturation step: 94°C for 10 min, followed by 30 cycles of 94°C for 40 s, annealing step: 60°C for 40 s and 72°C for 1 min; and final elongation step at 72°C for 7 min   | [2] |
|                  | MultiIMP | F: TTGACACTCCATTTACDG<br>R: GATYGAGAATTAAGCCACYCT    | 139 | <i>bla<sub>IMP</sub></i> | Initial denaturation step: 94°C for 10 min, followed by 30 cycles of 94°C for 40 s, annealing step: 55°C for 40 s and 72°C for 1 min; and final elongation step at 72°C for 7 min   | [2] |
|                  | MultiVIM | F: GATGGTGTTTGGTCGCATA<br>R: CGAATGCGCAGCACCAG       | 390 | <i>bla<sub>VIM</sub></i> | Initial denaturation step: 94°C for 10 min, followed by 30 cycles of 94°C for 40 s, annealing step: 55°C for 40 s and 72°C for 1 min; and final elongation step at 72°C for 7 min   | [2] |
|                  | MultiKPC | F: CATTCAAGGGCTTTCTTGCTGC<br>R: ACGACGGCATAGTCATTTGC | 700 | <i>bla<sub>KPC</sub></i> | Initial denaturation step: 94°C for 10 min, followed by 30 cycles of 94°C for 40 s, annealing step: 55°C for 40 s and 72°C for 1 min; and final elongation step at 72°C for 7 min   | [2] |
| Fluoroquinolones | QnrA     | F: AGAGGATTTCTCACGCCAGG<br>R: TGCCAGGCACAGATCTTGAC   | 580 | <i>qnrA</i>              | Initial denaturation step: 95°C for 15 min, followed by 32 cycles of 95°C for 1 min, annealing step: 55°C for 1 min, and 72°C for 5 min and final longation step at 72°C for 10 min | [4] |

|              |      |                                                      |     |             |                                                                                                                                                                                      |     |
|--------------|------|------------------------------------------------------|-----|-------------|--------------------------------------------------------------------------------------------------------------------------------------------------------------------------------------|-----|
|              | QnrB | F: GGMATHGAAATTCGCCACTG<br>R: TTTGCGYGYCGCCAGTCGAA   | 264 | <i>qnrB</i> | Initial denaturation step: 95°C for 15 min, followed by 32 cycles of 95°C for 1 min, annealing step: 55°C for 1 min, and 72°C for 5 min and final elongation step at 72°C for 10 min | [4] |
|              | QnrC | F: GGGTTGTACATTTATTGAATCG<br>R: CACCTACCCATTTATTTTCA | 307 | <i>qnrC</i> | Initial denaturation step: 95°C for 15 min, followed by 32 cycles of 95°C for 1 min, annealing step: 55°C for 1 min, and 72°C for 5 min and final elongation step at 72°C for 10 min | [5] |
|              | QnrD | F: CGAGATCAATTTACGGGGAATA<br>R: AACAAAGCTGAAGCGCCTG  | 533 | <i>qnrD</i> | Initial denaturation step: 95°C for 15 min, followed by 32 cycles of 95°C for 1 min, annealing step: 55°C for 1 min, and 72°C for 5 min and final elongation step at 72°C for 10 min | [4] |
|              | QnrS | F: ACGACATTCGTCAACTGCAA<br>R: TAAATTGGCACCCCTGTAGGC  | 417 | <i>qnrS</i> | Initial denaturation step: 95°C for 15 min, followed by 32 cycles of 95°C for 1 min, annealing step: 55°C for 1 min, and 72°C for 5 min and final elongation step at 72°C for 10 min | [5] |
| Sulfonamides | sul1 | F: CGGCGTGGGCTACCTGAACG<br>R: GCCGATCGCGTGAAGTTCCG   | 433 | <i>sul1</i> | Initial denaturation step: 94°C for 5 min, followed by 30 cycles of 94°C for 30 s, annealing step: 65°C for 30 s, 72°C for 2 min, and final extension step at 72°C for 10 min        | [6] |
|              | sul2 | F: GCGCTCAAGGCAGATGGCATT<br>R: GCGTTTGATACCGGCACCCGT | 293 | <i>sul2</i> | Initial denaturation step: 94°C for 5 min, followed by 30 cycles of 94°C for 30 s, annealing step: 65°C for 30 s, 72°C for 2 min, and final extension step at 72°C for 10 min        | [6] |

|               |      |                                                                    |     |               |                                                                                                                                                                                |     |
|---------------|------|--------------------------------------------------------------------|-----|---------------|--------------------------------------------------------------------------------------------------------------------------------------------------------------------------------|-----|
| Tetracyclines | TetA | F: GCTACATCCTGCTTGCCTTC<br>R: CATAGATCGCCGTGAAGAGG                 | 210 | <i>tet(A)</i> | Initial denaturation step: 94°C for 5 min, followed by 30 cycles of 94°C for 30 s, annealing step: 60°C for 30 s, 72°C for 2 min, and final extension step at 72°C for 10 min  | [6] |
|               | TetB | F: TTG GTT AGG GGC AAG TTT TG<br>R: GTA ATG GGC CAA TAA CAC CG     | 659 | <i>tet(B)</i> | Initial denaturation step: 94°C for 5 min, followed by 35 cycles of 94°C for 1 min, annealing step: 55°C for 1 min, 72°C for 2 min and final elongation step: 72°C for 1·5 min | [7] |
|               | TetC | F: CTTGAGAGCCTTCAACCCAG<br>R: ATGGTCGTCATCTACCTGCC                 | 418 | <i>tet(C)</i> | Initial denaturation step: 94°C for 5 min, followed by 30 cycles of 94°C for 30 s, annealing step: 60°C for 30 s, 72°C for 2 min, and final extension step at 72°C for 10 min  | [6] |
|               | TetL | F: TCG TTA GCG TGC TGT CAT TC<br><br>R: GTA TCC CAC CAA TGT AGC CG | 267 | <i>tet(L)</i> | Initial denaturation step: 94°C for 5 min, followed by 35 cycles of 94°C for 1 min, annealing step: 55°C for 1 min and final elongation step: 72°C for 1·5 min                 | [7] |
|               | TetM | F: GTG GAC AAA GGT ACA ACG AG<br>R: CGG TAA AGT TCG TCA CAC AC     | 406 | <i>tet(M)</i> | Initial denaturation step: 94°C for 5 min, followed by 35 cycles of 94°C for 1 min, annealing step: 55°C for 1 min and final elongation step: 72°C for 1·5 min                 | [7] |
|               | TetO | F: ACGGARAGTTTATTGTATACC<br>R: TGGCGTATCTATAATGTTGAC               | 171 | <i>tet(O)</i> | Initial denaturation step: 94°C for 5 min, followed by 35 cycles of 94°C for 1 min, annealing step: 55°C for 1 min and final elongation step: 72°C for 1·5 min                 | [6] |

1. Maynard, C.; Bekal, S.; Sanschagrin, F.; Levesque, R.C.; Brousseau, R.; Masson, L.; Lariviere, S.; Harel, J. Heterogeneity among virulence and antimicrobial resistance gene profiles of extraintestinal *Escherichia coli* isolates of animal and human origin. *J. Clin. Microbiol.* **2004**, *42*, 5444–5452.
2. Dallenne, C.; Da Costa, A.; Decre, D.; Favier, C.; Arlet, G. Development of a set of multiplex PCR assays for the detection of genes encoding important  $\beta$ -lactamases in Enterobacteriaceae. *J. Antimicrob. Chemother.* **2010**, *65*, 490–495.
3. Abouelfetouh, A.; Torky, A.S. Aboulmagd, E. Phenotypic and genotypic characterization of carbapenem-resistant *Acinetobacter baumannii* isolates from Egypt. *Antimicrob. Resist. Infection Cont.* **2019**, *8*, 185.
4. El-Badawy, M.F.; Tawakol, W.M.; El-Far, S.W.; Maghrabi, I.A.; Al-Ghamdi, S.A.; Mansy, M.S.; Ashour, M.S.; Shohaye, M.M. Molecular Identification of Aminoglycoside-Modifying Enzymes and Plasmid-Mediated Quinolone Resistance Genes among *Klebsiella pneumoniae* Clinical Isolates Recovered from Egyptian Patients. *Int. J. Microbiol.* **2017**, *2017*, 8050432.
5. Pribul, B.R.; Festivo, M.L.; Rodrigues, M.S.; Costa, R.G.; Rodrigues, E.C.d.P.; de Souza, M.M.S.; Rodrigues, D.d.P. Characteristics of Quinolone Resistance in *Salmonella* spp. isolates from the food chain in Brazil. *Front. Microbiol.* **2017**, *8*, 299.
6. Li, L.; Ye, L.; Zhang, S.; Meng, H. Isolation and identification of aerobic bacteria carrying tetracycline and sulfonamide resistance genes obtained from a meat processing plant. *J. Food Sci.* **2016**, *81*, M1480–M1484.
7. Ng, L.K.; Martin, I.; Alfa, M.; Mulvey, M. Multiplex PCR for the detection of tetracycline resistant genes. *Mol. Cell. Probes* **2001**, *15*, 209–215.
